# Supplementary material
Source: HighWire-hosted journal article supplement (http://cmajopen.ca/highwire/filestream/81237/field_highwire_adjunct_files/1/2018-0202-2-at.pdf)
Supplement: 2018-0202-2-at.pdf [file 2018-0202-2-at.pdf]

## **Appendix 2 (as supplied by the authors): Survey questionnaire, English version**

### **Survey language - ASK ALL**

Préférez-vous répondre à ce questionnaire en anglais ou en français ?

Would you prefer to complete the survey in English or French?

- English (9)
- Français (12)

### **- SECTION 1 SOCIODEMOGRAPHIC CHARACTERISTICS**

#### **INT01 - ASK ALL**

"I agree to answer the following survey questions truthfully and thoughtfully."

- Yes (1)
- No (NE)

#### **AGEX - ASK ALL**

How old are you?

- Under 18 (0)
- Between 18 and 24 (1)
- Between 25 and 34 (2)
- Between 35 and 39 (3)
- Between 40 and 44 (4)
- Between 45 and 54 (5)
- Between 55 and 64 (6)
- Between 65 and 69 (7)
- Between 70 and 74 (8)
- 75 or older (9)
- I prefer not to answer (99)

#### **PROV - ASK ALL**

In which province or territory do you live?

- British Columbia (BC)
- Alberta (AB)
- Saskatchewan (SK)
- Manitoba (MB)
- Ontario (ON)
- Quebec (QC)
- New Brunswick (NB)
- Nova Scotia (NS)
- Prince Edward Island (PE)
- Newfoundland and Labrador (NF)
- Northwest Territories (NT)
- Yukon (YK)
- Nunavut (NU)

**QAB - ASK IF PROV=AB**

In which region of Alberta do you live?

- Calgary (61)
- Edmonton (62)
- Other region of Alberta (63)

**QABA - ASK IF QAB=61**

Do you reside within the city limits of Calgary, Alberta?

- Yes (1)
- No (2)

**QABB - ASK IF QABA=1**

In which quadrant of Calgary do you live?

- Southwest (1)
- Southeast (2)
- Northwest (3)
- Northeast (4)

**QABC - ASK IF QAB=62**

Do you reside within the city limits of Edmonton, Alberta?

- Yes (1)
- No (2)

**QABD - ASK IF QAB=63**

Just to clarify, do you live...

- North of Red Deer (1)
- In and around Red Deer (2)
- South of Red Deer (3)

**QBC - ASK IF PROV=BC**

In which region of British Columbia do you live?

- Greater Vancouver (Metro) (70)
- Greater Victoria (71)
- Other region in British Columbia (72)

**QON - ASK IF PROV=ON**

In which region of Ontario do you live?

- Hamilton - Niagara Peninsula (50)
- Kingston - Pembroke (51)
- Kitchener - Waterloo - Barrie (52)

- Greater London area (53)
- Muskoka - Kawarthas (54)
- Northeast (55)
- Northwest (56)
- Greater Ottawa area (57)
- Stratford - Bruce Peninsula (58)
- Greater Toronto area (59)
- Windsor - Sarnia (60)

**Q0QC - ASK ALL**

In which region of Quebec do you live?

- Bas-Saint-Laurent (1)
- Saguenay-Lac-Saint-Jean (2)
- Capitale-Nationale (3)
- Mauricie (4)
- Estrie (5)
- Montréal (6)
- Outaouais (7)
- Abitibi-Témiscamingue (8)
- Côte-Nord (9)
- Nord-du-Québec (10)
- Gaspésie/Îles-de-la-Madeleine (11)
- Chaudière-Appalaches (12)
- Laval (13)
- Lanaudière (14)
- Laurentides (15)
- Montérégie (16)
- Centre-du-Québec (17)

**Q0QCA - ASK IF Q0QC=14(Lanaudière)**

Your city of residence may not appear on the list at the next question.

For statistical processing reasons, only certain cities outside of the Island of Montreal are identified. If this is the case, please select the response "other city".

In which city do you live?

- L'Assomption (1)
- Charlemagne (2)
- L'Épiphanie (3)
- Lavaltrie (4)
- Mascouche (5)
- Repentigny (6)
- Saint-Sulpice (7)
- Terrebonne (8)
- Other Lanaudière city (96)

**Q0QCB - ASK IF Q0QC=15(Laurentides)**

Your city of residence may not appear on the list at the next question.

For statistical processing reasons, only certain cities outside of the Island of Montreal are identified. If this is the case, please select the response "other city".

In which city do you live?

- Blainville (1)
- Boisbriand (2)
- Bois-des-Filion (3)
- Deux-Montagnes (4)
- Gore (5)
- Kanesatake (6)
- Lorraine (7)
- Mirabel (8)
- Oka (9)
- Pointe-Calumet (10)
- Rosemère (11)
- Saint-Colomban (12)
- Sainte-Anne-des-Plaines (13)
- Sainte-Marthe-sur-le-Lac (14)
- Sainte-Thérèse (15)
- Saint-Eustache (16)
- Saint-Jérôme (17)
- Saint-Joseph-du-Lac (18)
- Saint-Placide (19)
- Saint-Lin-Laurentides (20)
- Other city of Laurentides (96)

**Q0QCC - ASK IF Q0QC=16(Montérégie)**

Your city of residence may not appear on the list at the next question.

For statistical processing reasons, only certain cities outside of the Island of Montreal are identified. If this is the case, please select the response "other city".

In which city do you live?

- Beauharnois (1)
- Beloeil (2)
- Boucherville (3)
- Brossard (4)
- Candiac (5)
- Carignan (6)
- Chambly (7)
- Châteauguay (8)

- Coteau-du-Lac (9)
- Delson (10)
- Hudson (11)
- Kahnawake (12)
- La Prairie (13)
- Léry (14)
- Les Cèdres (15)
- Les Coteaux (16)
- L'Île-Cadieux (17)
- L'Île-Perrot (18)
- Longueuil (19)
- McMasterville (20)
- Mercier (21)
- Mont-Saint-Hilaire (22)
- Notre-Dame-de-l'Île-Perrot (23)
- Otterburn Park (24)
- Pincourt (25)
- Pointe-des-Cascades (26)
- Richelieu (27)
- Saint-Amable (28)
- Saint-Basile-le-Grand (29)
- Saint-Bruno-de-Montarville (30)
- Saint-Constant (31)
- Sainte-Catherine (32)
- Saint-Jean-sur-Richelieu (47)
- Sainte-Julie (33)
- Saint-Isidore (34)
- Saint-Lambert (35)
- Saint-Lazare (36)
- Saint-Mathias-sur-Richelieu (37)
- Saint-Mathieu (38)
- Saint-Mathieu-de-Beloeil (39)
- Saint-Philippe (40)
- Saint-Zotique (41)
- Terrasse-Vaudreuil (42)
- Varennes (43)
- Vaudreuil-Dorion (44)

- Vaudreuil-sur-le-Lac (45)
- Verchères (46)
- Other city of Montérégie (96)

**Q0QCD - ASK IF Q0QC=3(Capitale-Nationale)**

Your city of residence may not appear on the list at the next question.

For statistical processing reasons, only certain cities on the outskirts of Québec city are identified. If this is the case, please select the response "other city".

In which city do you live?

- Ville de Québec (1)
- Boischatel (2)
- Château-Richer (3)
- Fossambault-sur-le-Lac (4)
- L'Ancienne-Lorette (5)
- L'Ange-Gardien (6)
- Lac-Beauport (7)
- Lac-Delage (8)
- Lac-Saint-Joseph (9)
- Neuville (10)
- Notre-Dame-des-Anges (11)
- Saint-Augustin-de-Desmaures (12)
- Saint-François-de-l'Île-d'Orléans (13)
- Saint-Gabriel-de-Valcartier (14)
- Saint-Jean-de-l'Île-d'Orléans (15)
- Saint-Laurent-de-l'Île-d'Orléans (16)
- Saint-Pierre-de-l'Île-d'Orléans (17)
- Sainte-Brigitte-de-Laval (18)
- Sainte-Catherine-de-la-Jacques-Cartier (19)
- Sainte-Famille (20)
- Sainte-Pétronille (21)
- Shannon (22)
- Stoneham-et-Tewkesbury (23)
- Wendake (24)
- Other city of Capitale-Nationale (96)

**Q0QCE - ASK IF Q0QC=12(Chaudière-Appalaches)**

Your city of residence may not appear on the list at the next question.

For statistical processing reasons, only certain cities on the outskirts of Québec city are identified. If this is the case, please select the response "other city".

In which city do you live?

- Ville de Lévis (1)
- Beaumont (2)
- Saint-Antoine-de-Tilly (5)
- Saint-Henri (3)
- Saint-Lambert-de-Lauzon (4)
- Other city of Chaudière-Appalaches (96)

**VILLE - ASK IF Q0QC=6(Montréal)**

In which borough or city do you live?

- Ahuntsic – Cartierville (1)
- Anjou (2)
- Baie d'Urfé (3)
- Beaconsfield (4)
- Côte-des-Neiges – Notre-Dame-de-Grâce (5)
- Côte-Saint-Luc (6)
- Dollard-des-Ormeaux (7)
- Dorval (8)
- Hampstead (9)
- Kirkland (10)
- L'Île-Bizard – Sainte-Geneviève (11)
- Lachine (12)
- Lasalle (13)
- Le Plateau-Mont-Royal (14)
- Mercier – Hochelaga-Maisonneuve (15)
- Montréal-Est (16)
- Montréal-Nord (17)
- Montréal-Ouest (18)
- Mont-Royal (19)
- Outremont (20)
- Pierrefonds – Roxboro (21)
- Pointe-Claire (22)
- Rivière-des-Prairies – Pointe-aux-Trembles (23)
- Rosemont – La Petite-Patrie (24)
- Sainte-Anne-de-Bellevue (25)
- Saint-Laurent (26)

- Saint-Léonard (27)
- Senneville (28)
- Sud-Ouest (29)
- Verdun (30)
- Ville-Marie (31)
- Villeray – Saint-Michel – Parc-Extension (32)
- Westmount (33)
- Other (97)

**Q0QCF - ASK IF Q0QCD=1**

Please indicate in which borough you live:

- Borough of La Cité-Limoilou (1)
- Borough of Sainte-Foy-Sillery-Cap-Rouge (2)
- Borough of Les Rivières (3)
- Borough of Beauport (4)
- Borough of Charlesbourg (5)
- Borough of La Haute-St-Charles (Lac-Saint-Charles, Saint-Émile, Loretteville, Les Châtel, Val-Bélair) (6)

**Q0QCG - ASK IF Q0QCE=1**

Please indicate in which borough you live:

- Desjardins (1)
- Chutes-de-la-Chaudière-Est (2)
- Chutes-de-la-Chaudière-Ouest (3)

**SEXE - ASK ALL**

Please indicate your sex:

*Note: As indicated by Statistics Canada, transgender, transsexual, and intersex Canadians should indicate the sex (male or female) with which they most associate themselves.*

- Male (1)
- Female (2)

**PROP - ASK ALL**

Do you OWN or RENT your current main residence?

- Own (1)
- Rent (2)
- I prefer not to answer (9)



**- SECTION 2 to SECTION 7 other partners surveys (questions are not displayed for confidentiality reasons)**

CG1 - ASK ALL

\*\*\*New Topic\*\*\* (other partner)

**- SECTION 8 Shared decision making survey**

CS1 - ASK ALL

\*\*\*New Topic\*\*\*

During the past year, have you received a consultation with a health professional (doctors, nurses, pharmacists, physiotherapists, nutritionists, etc.)?

- Yes (1)
- No (2)
- I prefer do not answer (9)

**CS2 - ASK IF CS1=1**

During the past year, regarding a consultation with a health professional (doctors, nurses, pharmacists, physiotherapists, nutritionists, etc.), how often did they...

|                                                                                                             | Always<br>(1)         | Often<br>(2)          | Sometime<br>(3)       | Rarely<br>(4)         | Never<br>(5)          | I don't know /<br>I prefer not to<br>answer (9) |
|-------------------------------------------------------------------------------------------------------------|-----------------------|-----------------------|-----------------------|-----------------------|-----------------------|-------------------------------------------------|
| ...mentioned you had a choice of treatment or care plan? (1)                                                | <input type="radio"/> | <input type="radio"/> | <input type="radio"/> | <input type="radio"/> | <input type="radio"/> | <input type="radio"/>                           |
| ...presented the advantages and disadvantages of the different possible treatment or care plan options? (2) | <input type="radio"/> | <input type="radio"/> | <input type="radio"/> | <input type="radio"/> | <input type="radio"/> | <input type="radio"/>                           |
| ...asked for your ideas and preferences regarding your treatment or care plan? (3)                          | <input type="radio"/> | <input type="radio"/> | <input type="radio"/> | <input type="radio"/> | <input type="radio"/> | <input type="radio"/>                           |
| ...asked whether you preferred one option or another about your treatment or your care plan? (4)            | <input type="radio"/> | <input type="radio"/> | <input type="radio"/> | <input type="radio"/> | <input type="radio"/> | <input type="radio"/>                           |
| ...involved you as much as you wanted in the decisions about your treatment or care plan? (5)               | <input type="radio"/> | <input type="radio"/> | <input type="radio"/> | <input type="radio"/> | <input type="radio"/> | <input type="radio"/>                           |

**CS3 - ASK ALL**

Are you or is a household member receiving home care services for a health problem?

- Yes (1)
- No (2)
- I prefer do not answer (9)

- SECTION 9 to SECTION 15 other partners surveys (questions are not displayed for confidentiality reasons)

- SECTION 16 Question to detect robots

QColor - ASK ALL

Which of the following is not a color:

- Purple (1)
- Glass (2)
- Yellow (3)
- Blue (4)
- Green (5)

**ETHN - ASK ALL**

What is your ethnic origin?

- Caucasian (white) (1)
- Aboriginal / First Nations (2)
- Latin American (Mexican, Chilean, Costa Rican, etc.) (3)
- Arabic (Middle East, North Africa) (4)
- Black (African, African-American, etc.) (5)
- South Asian (Indian, Bangladeshi, Pakistani, Sri Lankan, etc.) (6)
- Southeast Asian (Vietnamese, Cambodian, Malaysian, etc.) (7)
- West Asian (Iranian, Afghan, etc.) (8)
- Chinese (9)
- Filipino (10)
- Korean (11)
- Japanese (12)
- Other (96)
- I prefer not to answer (99)

**AREA - ASK ALL**

Which of the following best describes the area in which you live:

- Urban area (1)
- Suburban area (2)
- Rural area (3)
- I don't know / I prefer not to answer (9)

**SCOL - ASK ALL**

What is the last year of education that you have completed?

- Elementary (7 years or less) (1)
- High school, general or vocational (8 to 12 years) (2)
- College (pre-university, technical training, certificate, accreditation or advanced diploma (13-15 years)) (3)
- University certificates and diplomas (4)
- University Bachelor (including classical studies) (5)
- University Master's degree (6)
- University Doctorate (PhD) (7)
- I prefer not to answer (9)

**ENFAN - ASK ALL**

Are there any children who are UNDER 18 YEARS OF AGE living in your household?

(IF SO): Are any of them 12 YEARS OLD AND OLDER or LESS THAN 12 years old?

- Yes: 12 years of age and OLDER ONLY (1)
- Yes: 12 years of age and older AND younger than 12 years old (2)
- Yes: YOUNGER than 12 years old ONLY (3)
- No children under 18 years old at all in the household (4)
- I prefer not to answer (9)

**OCCUP - ASK ALL**

What is your current main occupation?

N.B. WE ARE TALKING ABOUT PAYING JOBS ONLY.

Even if you are on a sabbatical, maternity/paternity, illness or work-related accident leave, please select your OCCUPATION.

*td { vertical-align : top; }*

- OFFICE WORKER  
(Cashier, office clerk, accounting clerk, secretary, etc.) (1)
- PERSONNEL SPECIALIZED IN SALES  
(Insurance agent, salesperson, sales clerk, real estate agent, real estate broker, sales rep, etc.) (2)
- PERSONNEL SPECIALIZED IN SERVICES  
(Security agent, taxi driver, hairdresser, cook, clergy member, military force member, police officer, firefighter, etc.) (3)
- MANUAL WORKERS  
(Farmer, packer, day labourer, miner, fisherman, forest worker, etc.) (4)
- SKILLED, SEMI-SKILLED WORKERS  
(Bricklayer, truck driver, electrician, machine operator, mechanic, painter, plumber, etc.) (5)
- SCIENCE AND TECHNOLOGIES WORKERS  
(Computer operator, programmer-analyst, technician, audio-technician, lab technician, etc.) (6)
- PROFESSIONALS  
(Archeologist, architect, artist, lawyer, banker, biologist, chemist, accountant, consultant, foreman, dentist, designer, etc.) (7)
- MANAGERS/ADMINISTRATORS/OWNERS  
(Director, editor, entrepreneur, executive, manager, businessperson, politician, president, etc.) (8)
- HOMEMAKER (9)
- STUDENT  
(Full-time or whose studies take up most of his/her time) (10)
- RETIRED  
(Pre-retired or annuitant) (11)
- UNEMPLOYED  
(Unemployment, welfare) (12)
- Other (96)
- I prefer not to answer (99)

**REVEN1 - ASK ALL**

Among the following categories, which one best reflects the total INCOME, before taxes, of all the members of your household in 2017?

- \$19,999 or less (1)
- Between \$20,000 and \$39,999 (2)
- Between \$40,000 and \$59,999 (3)
- Between \$60,000 and \$79,999 (4)
- Between \$80,000 and \$99,999 (5)
- Between \$100,000 and \$124,999 (6)
- Between \$125,000 and \$149,999 (7)
- \$150,000 or more (8)
- I prefer not to answer (99)

**LANGU - ASK ALL**

What is the language you first learned at home in your childhood and that you still understand?

- French (1)
- English (2)
- Other (3)
- English and French (4)
- French and other (5)
- English and other (6)
- Other and other (7)
- I prefer not to answer (9)

**STATU - ASK ALL**

You are...?

- Single (1)
- Married (2)
- Common law (3)
- Divorced (4)
- Widowed (5)
- Separated (6)
- I prefer not to answer (9)

**POSTAL3 - ASK ALL**

Please indicate the first 3 characters of your postal code.

*.questionarea:nth-of-type(2) .questiontitle { display:none; }*

**MessComplete**

Thank you, you have completed the survey.

^f('REDIRTXT')^
